# Supplementary material
Source: MDPI journal article supplement (https://www.mdpi.com/1424-2818/10/4/113)

## Supplementary figures

**Figure S1.** Comparative map of the Peregrine falcon (FPE), Saker falcon (FCH) and Gyr falcon (FRU) chromosomes with the position of all BACs. The red lines indicate inverted segments.

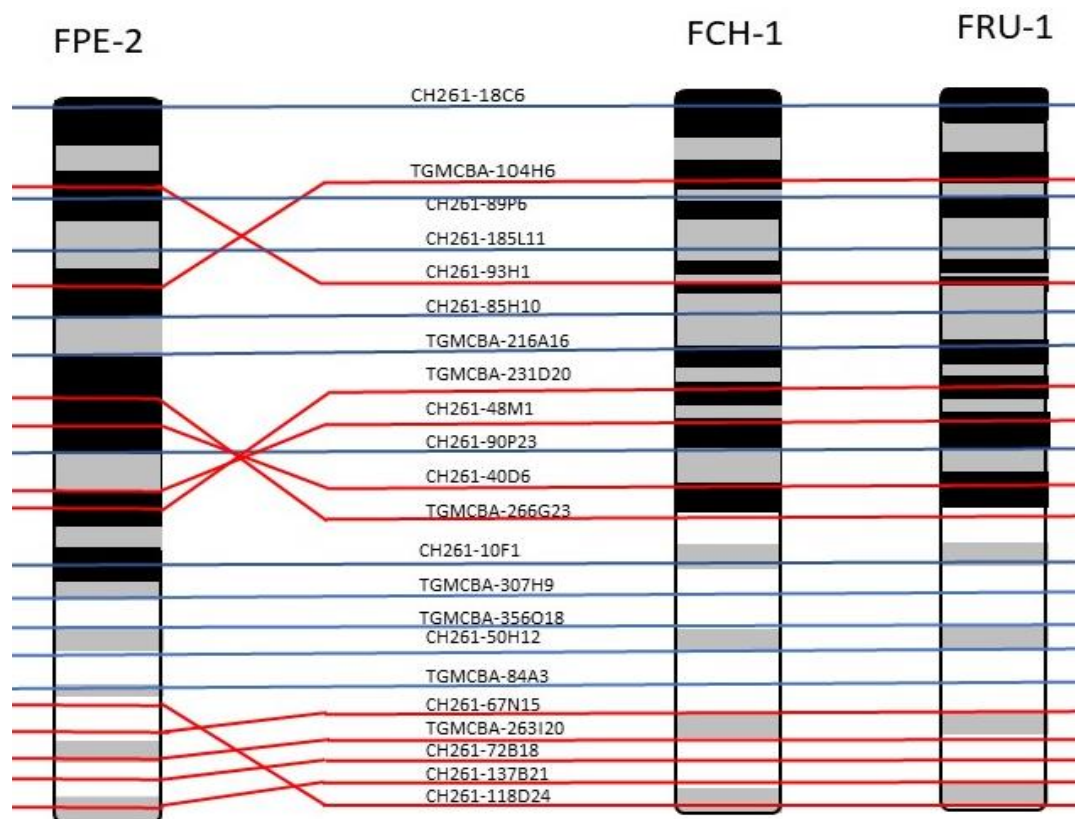

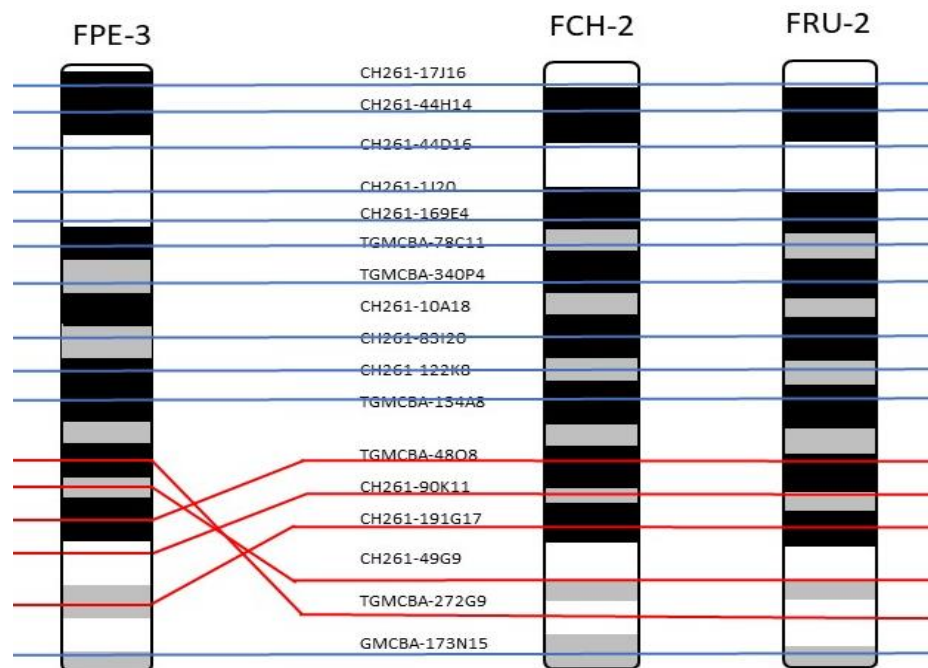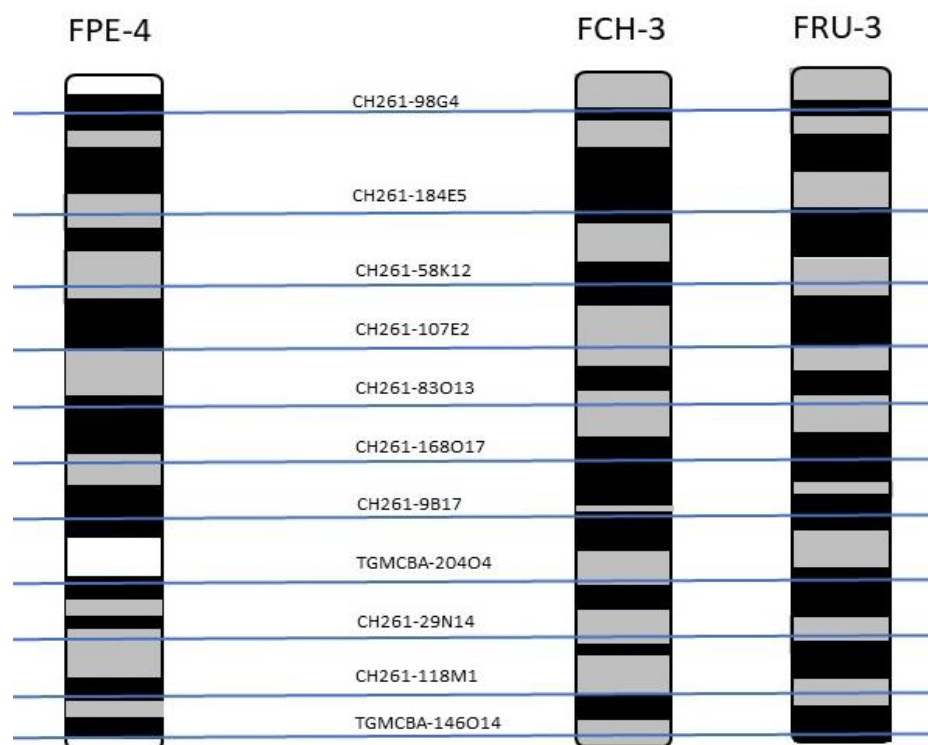

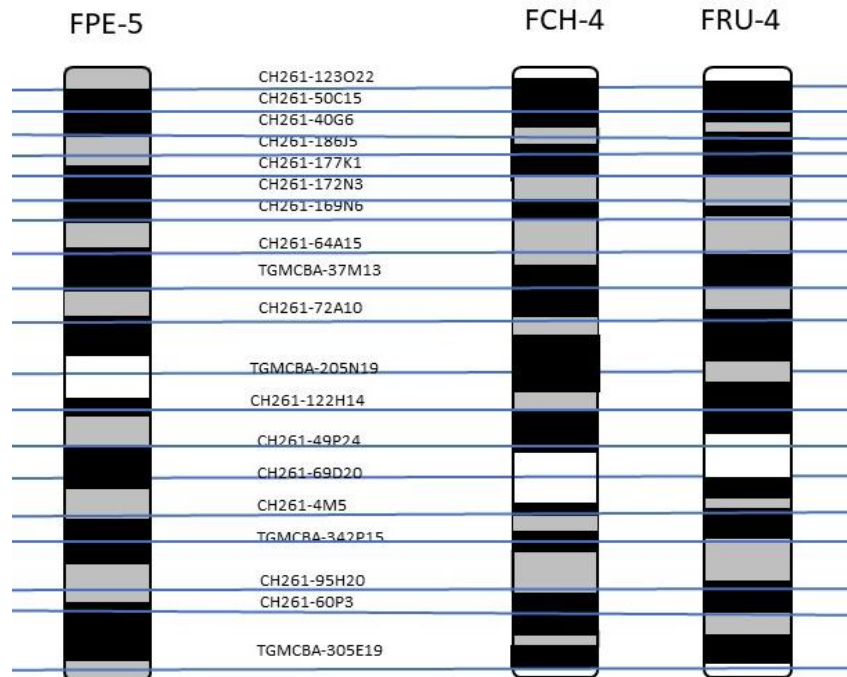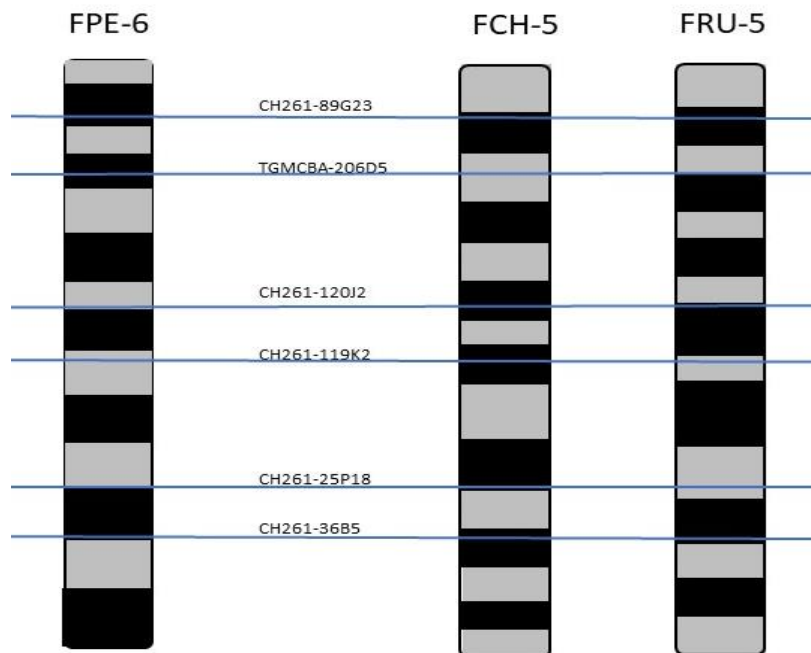

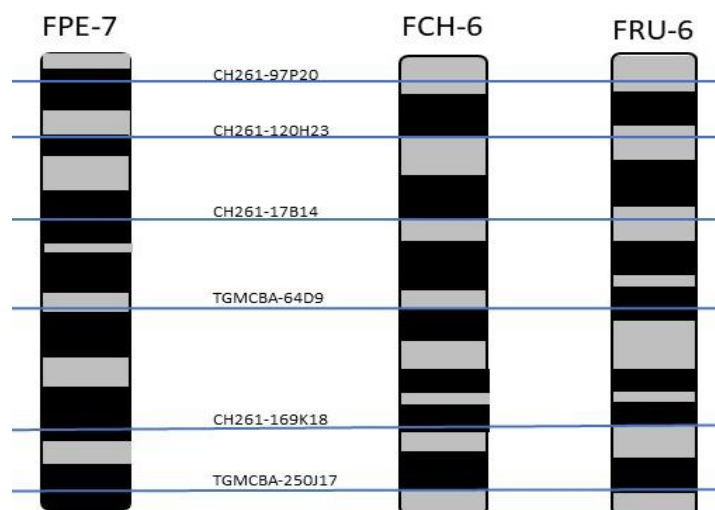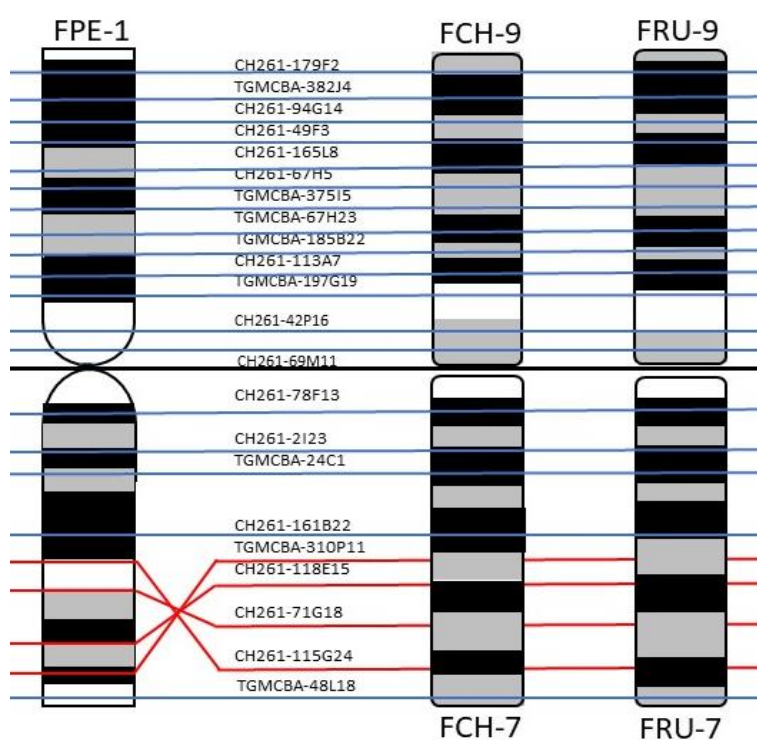

FCH-7

FRU-7

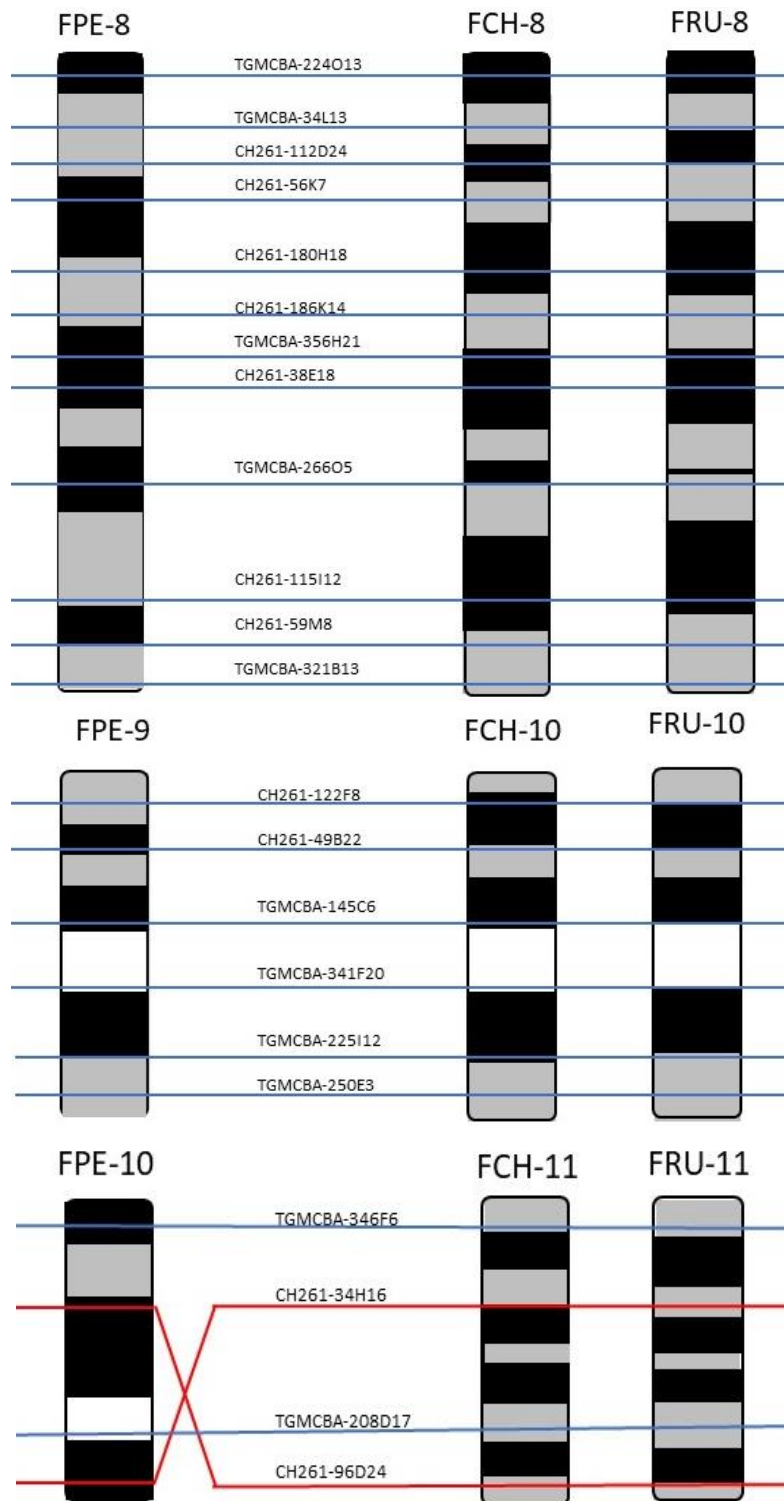

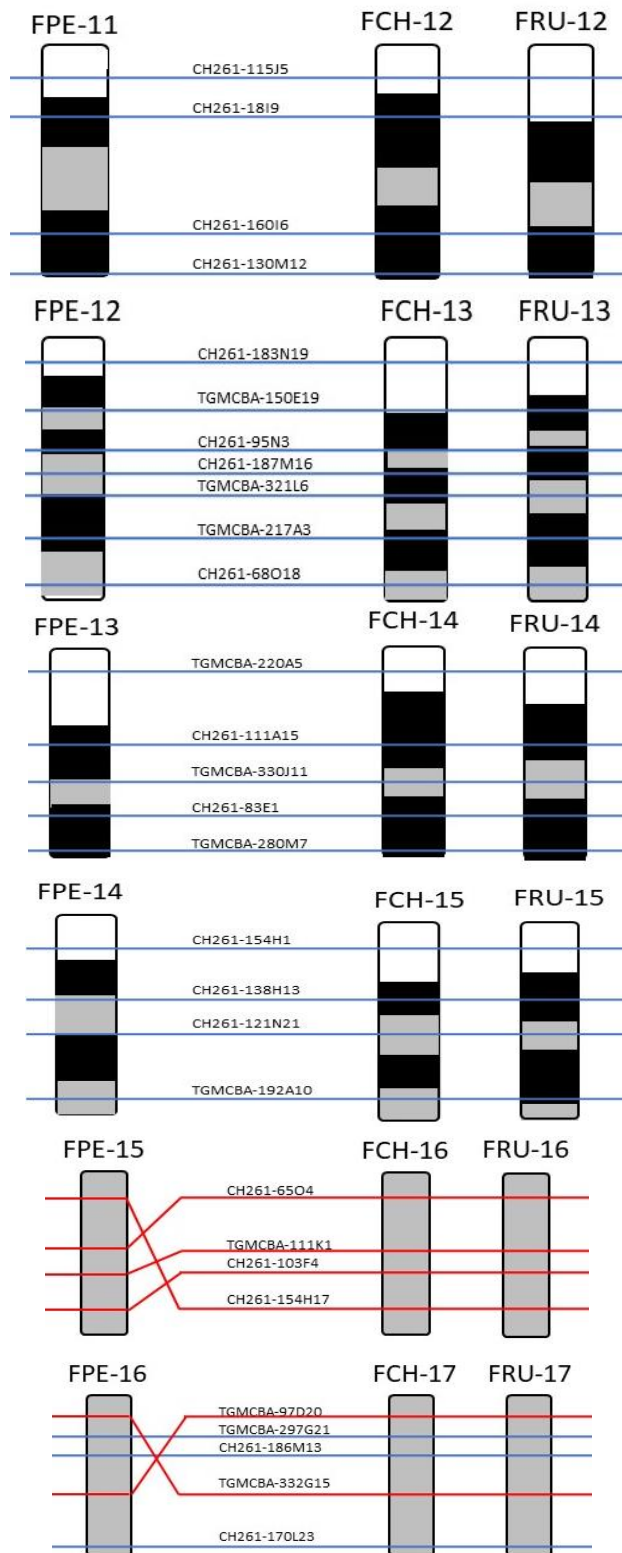

Supplement: s1 [file s1]
